# Supplementary material for: Branched TiO2 nanoarrays sensitized with CdS quantum dots for highly efficient photoelectrochemical water splitting
Source: Royal Society of Chemistry journal article supplement (doi:10.1039/c3cp51291f), 2013-01-01
Supplement: c3cp51291f.pdf [file c3cp51291f.pdf]

**Supporting Information**

**Branched TiO<sub>2</sub> Nanoarrays Sensitized with CdS Quantum  
Dots for Highly Efficient Photoelectrochemical Water  
Splitting**

Fengli Su, Jianwei Lu, Ye Tian, Xinbin Ma, and Jinlong Gong<sup>\*</sup>

*Key Laboratory for Green Chemical Technology of Ministry of Education, School of  
Chemical Engineering and Technology, Tianjin University, Tianjin 300072, China*

\*Corresponding author: [jlgong@tju.edu.cn](mailto:jlgong@tju.edu.cn)

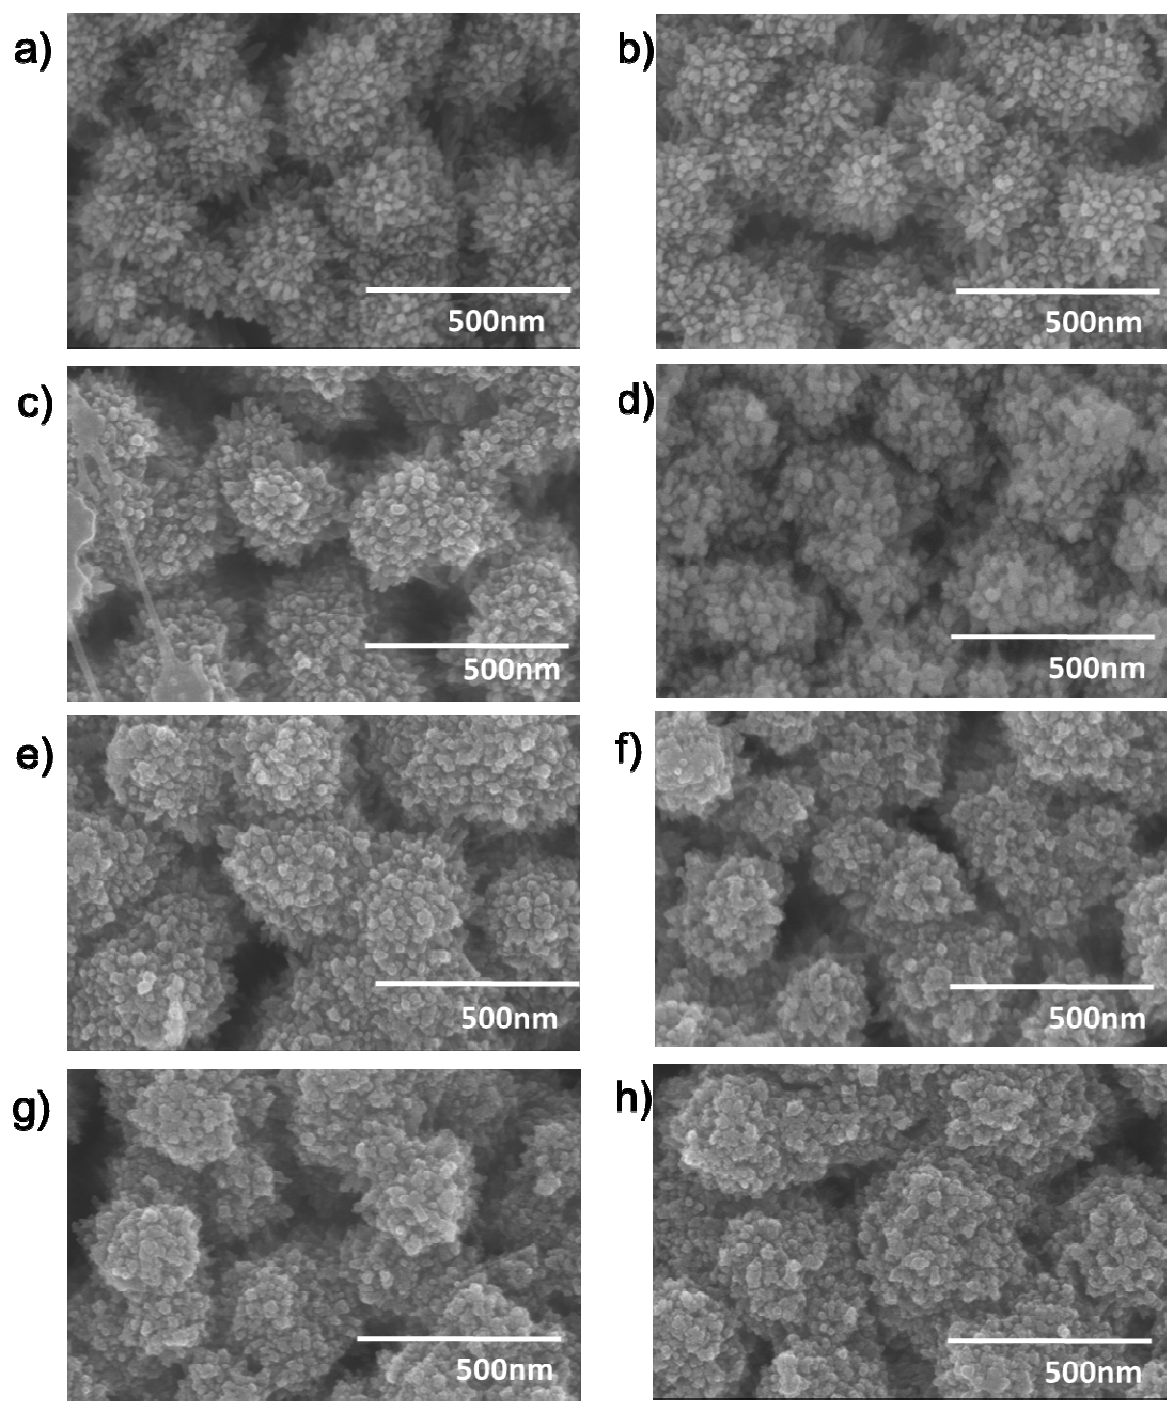

**Figure S1.** FESEM images of CdS/TiO<sub>2</sub> B-NRs : a)-h) TiO<sub>2</sub> B-NRs sensitized by CdS with different S-CBD cycles(0, 1, 3, 5, 7, 9, 11, 13).

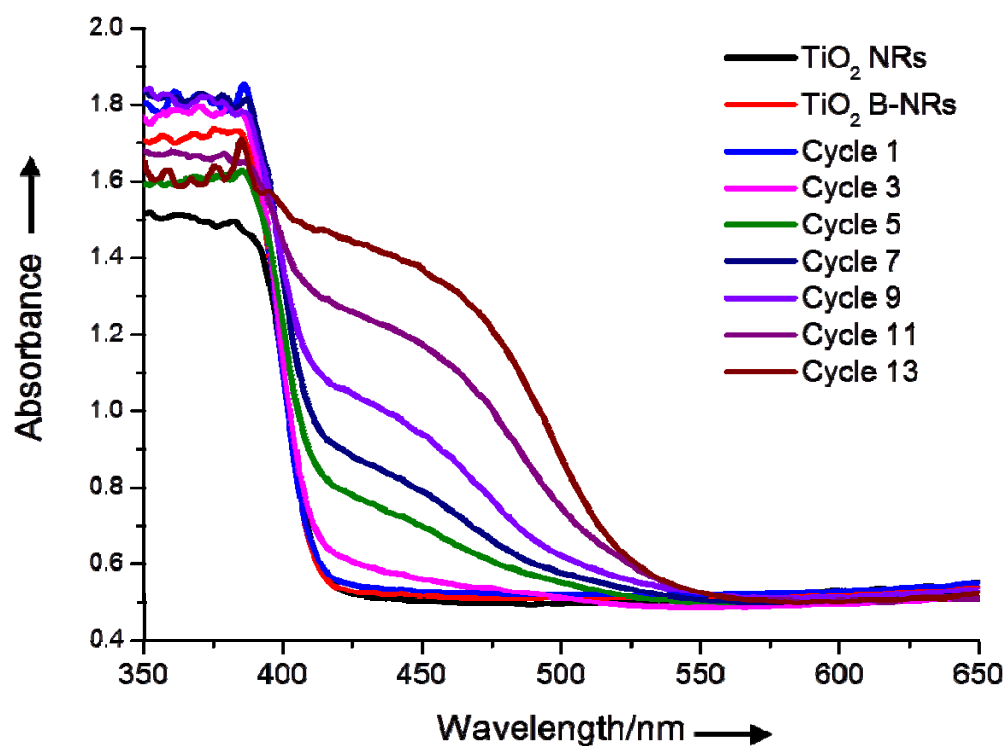

**Figure S2.** UV-Vis absorption spectra of TiO<sub>2</sub> NRs and CdS/TiO<sub>2</sub> B-NRs (different S-CBD cycles).

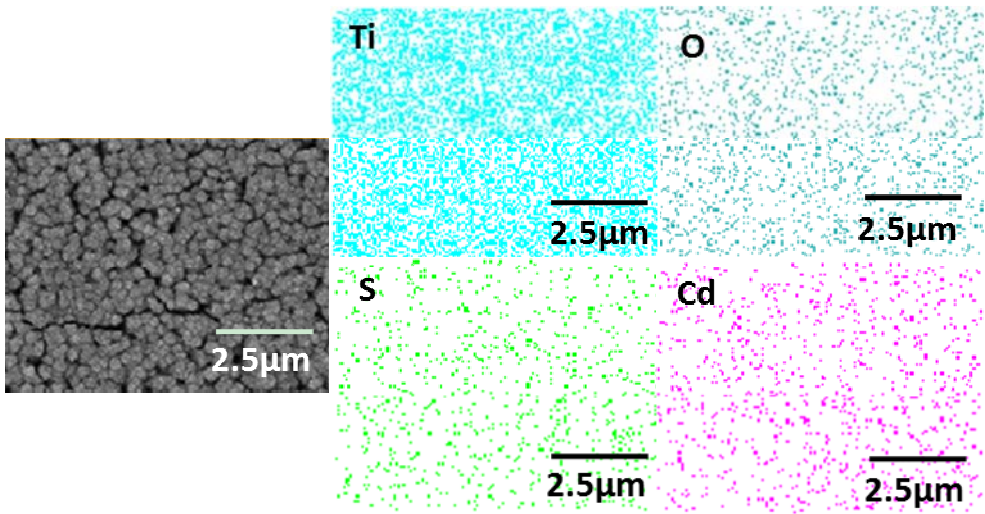

**Figure S3.** Element mapping image of Ti, Cd, O and S.

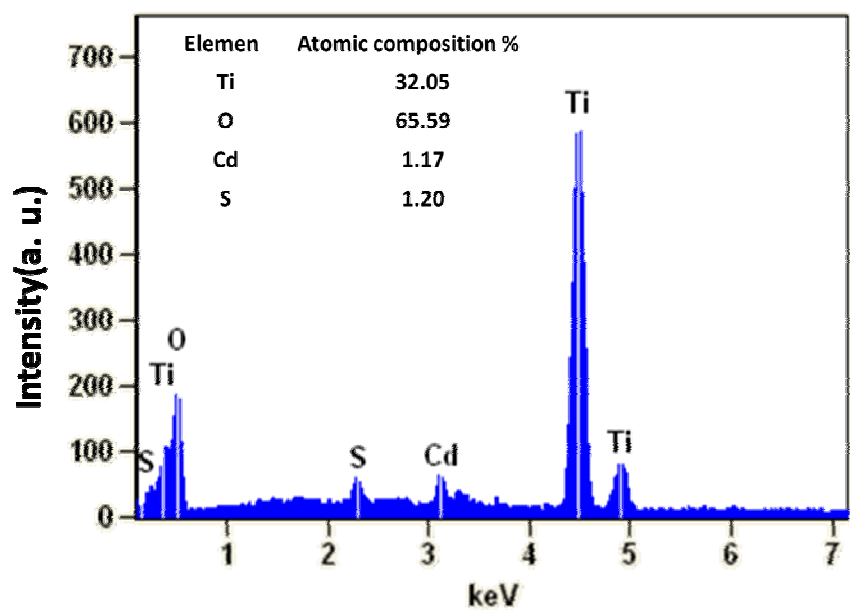

**Figure S4.** Energy dispersive X-ray spectroscopy (EDS) spectra of CdS/TiO<sub>2</sub> B-NRs.
